# Supplementary material
Source: MDPI journal article supplement (https://www.mdpi.com/1996-1073/13/5/1134)
Supplement: s1 [file s1]

**Appendix A1.** Design of the Survey and parameters analyzed. (Users and No users)

| Tools                                                                                    | Object                               | General Criteria of “items” SPSS data Analysis                                                                                                                                                                                                                        | Questions  |
|------------------------------------------------------------------------------------------|--------------------------------------|-----------------------------------------------------------------------------------------------------------------------------------------------------------------------------------------------------------------------------------------------------------------------|------------|
| Bibliographic                                                                            | -                                    | Detection of the main problems in order to help design the survey.                                                                                                                                                                                                    | Background |
| Survey<br>Users without<br>training on<br>BPSTs: 121<br>recent<br>graduate<br>architects | Description<br>of the<br>respondents | Profession (i1); other (i2); years of professional experience (i3); projects accomplished (i4); architectural practice (i5); employers in their company (i6); country of origin (i7).                                                                                 | Q1-Q5      |
|                                                                                          | Energy<br>simulation                 | Starting year of BPSTs utilization (i8); BPSTs evolution (i9); definition (i10); own definition of energy simulation (i11); *, objective of the energy simulation (i12); another possible objective* (i13).                                                           | Q6-Q9      |
|                                                                                          | Previous<br>knowledge                | Parameters considered in a BPST (i14); building geometry (i15); model simplification (i16); type of user of BPSTs (i17); architects’ level of knowledge (i18); BPSTs used (i19); other BPSTs* (i20).                                                                  | Q10-Q15    |
|                                                                                          | Arch. Design                         | Stage of the design process (i21-i23); skills (i24-i26).                                                                                                                                                                                                              | Q16        |
|                                                                                          | Training                             | University training (i27); energy-assessment teaching level (i28); BPSTs use promotion in the university (i29); level of importance of BPSTs training in the university (i30); promotion in the university (i31); suggestion to enhance the interest in BPSTs* (i32). | Q17-Q21    |
|                                                                                          | Reliability                          | Trial and error process (i33); outcomes validation (i34); , BPSTs tools at work (i35); users use BPSTs (i36); non-used BPSTs indicating the reasons (i37); other reasons* (i38).                                                                                      | Q22-Q26    |
|                                                                                          | Application of<br>BPSTs              | Type of projects (i39); the decision making process in order to integrate BPSTs (i40); proposals*(i41); best stage to use energy simulation(i42); BPSTs and the design stage(i43); simulation software helping create geometry (i44).                                 | Q27-Q31    |
|                                                                                          | Acquisition                          | Fields where BPSTs can be useful(i45); importance of simulation before building construction(i46); economic cost(i47); design process(i48); architect’s skill and experience (i49).                                                                                   | Q32-Q36    |

|  |                          |                                                                                                                                                                                                                                                                                                                                           |         |
|--|--------------------------|-------------------------------------------------------------------------------------------------------------------------------------------------------------------------------------------------------------------------------------------------------------------------------------------------------------------------------------------|---------|
|  | Relation with architects | Quantitative simulation software (i50); optimum building design (i51); aspects previously ignored (i52); barriers creating constructions (i53); optimum-shape design(i54); design necessities (i55); integrate in the design (i56); confidence (i57); knowledge (i58); reliability (i59); collaborate (i60); control of parameters (i61). | Q37-Q48 |
|  | Interest                 | Interest (i62); design assistance (i63); learning (i64); BPSTs intended for professionals (V65); nearly zero energy buildings (i66); limiting the architect's creativity (i67).                                                                                                                                                           | Q49-Q54 |
|  | Future                   | Energy simulation interest (i68); BPSTs implemented architecture offices (i69); Guides to show equivalences passive strategies designed (i70) ; advantages and disadvantages facilitate BPSTs (i71); opinion or suggestions (i72).                                                                                                        | Q55-Q59 |

#### Appendix A2. Design of the Survey and parameters analyzed (Users)

| Tools                                                              | General Criteria of "items" SPSS data Analysis                                                                                                                                                                                                                                                                                                                                                 | Questions |
|--------------------------------------------------------------------|------------------------------------------------------------------------------------------------------------------------------------------------------------------------------------------------------------------------------------------------------------------------------------------------------------------------------------------------------------------------------------------------|-----------|
| Survey Users with training on BPSTs: 50 recent graduate architects | Courses attended (i73); place (i74)*; self-taught (i75); specific training, software-manuals quality, satisfaction with BPSTs use, importance, BPSTs to develop their projects, adequation for architects (i82), training* (i83).                                                                                                                                                              | Q60-Q67   |
|                                                                    | Parameters influence, Interface, barriers                                                                                                                                                                                                                                                                                                                                                      |           |
|                                                                    | Simple interface design (i84); Data export with other software (Autocad, Sketchup...) (i85); Cost (i86); Simulation time (i87); 3D modelling included in the same software (i88); Easy data entry (V89); Position in the market (i90); Adaptation to the national regulation (i91); Easy interpretation of the results (i92); Auxiliary use of additional software (i93); Easy training (i94). | Q68       |
|                                                                    | Which of the next actions do you think is more important?                                                                                                                                                                                                                                                                                                                                      | Q69       |
|                                                                    | Easy output interpretation (i96); Flexible use (i97); Graphical representation of the results (i98); Adaptation to the national regulation (i99); Easy training (i100);                                                                                                                                                                                                                        | Q70       |
|                                                                    | Software evolution (i101); Complexity of use (i102); Learning curve (i103); Software tools not integrated in CAD tools (i104); High economic cost (i105); Poor interface (i106); Interpretation of outcomes (i107); Simple tools which do not provide the necessary information (i108).                                                                                                        | Q71       |

|                                                                                                                                                                                                                                                                                                                                                                                                                                                                                                                                                                                                                                                                                  |     |
|----------------------------------------------------------------------------------------------------------------------------------------------------------------------------------------------------------------------------------------------------------------------------------------------------------------------------------------------------------------------------------------------------------------------------------------------------------------------------------------------------------------------------------------------------------------------------------------------------------------------------------------------------------------------------------|-----|
| Data input and output, navigation and control (i109); Learning curve (i110); Documentation (i111); online help (i112); Software tools not integrated in CAD tools (i113); Tables for consulting (i114); Use default values and data input templates (i115); Database where construction materials are easily found Base (i116); Graphic representation of the design parameters (easy to understand by architects) 3D (i117); Visualization and design strategies Templates for the user relating to HVAC (i118); Error checking in order to ensure that the models used are correct (i119); GLOBAL ASSESSMENT CRITERION (i120);                                                 | Q72 |
| Qualitative and quantitative knowledge about the design decisions (i121); Templated creation (i122); Meeting the codes and rating systems (i123); Find objective responses to design question. (i124); Life-cycle assessments (i125); Economic aspects (i126); Definition of the most important parameters in the design stage (i127); Approach based on comparative design (i128); Generation of design alternatives(i129); Materials selection during the design stage (i130); Decision making process (i131); Low cost buildings (i132); Orientation about passive design (i133); Big components library (façades, roofs, etc...) (i134); GLOBAL ASSESSMENT CRITERION (i135). | Q73 |
| Validity, quality and resolution (i136); Accuracy (i137); Ability to simulate elements with sufficient detail (i138); Optimization of the building envelope (i139); Consideration of natural ventilation (i140); Information of the cost of energy reduction measures (i141); GLOBAL ASSESSMENT CRITERION (i142).                                                                                                                                                                                                                                                                                                                                                                | Q74 |
| It transfers information from one software to another without losing information and in a comfortable way (i143); It enables to manage and communicate construction data between different collaborators (i144); It allows modeling of organic volumen and non-cubic zones (i145); It allows the input of multiple modeling programs (i146); GLOBAL ASSESSMENT CRITERION (i147).                                                                                                                                                                                                                                                                                                 | Q75 |
| Alternation of the simulation process with the design process (i148); Multidisciplinary interfaces (i149); GLOBAL ASSESSMENT CRITERION(i150).                                                                                                                                                                                                                                                                                                                                                                                                                                                                                                                                    | Q76 |
| Improvements, Opinions of users* (i151)                                                                                                                                                                                                                                                                                                                                                                                                                                                                                                                                                                                                                                          | Q77 |
| All the respondents (i152)                                                                                                                                                                                                                                                                                                                                                                                                                                                                                                                                                                                                                                                       | Q78 |

\*Open questions ; Q (Number of Question)

# ENERGY SIMULATION OF BUILDINGS

Aim of the survey: opinion on the energy simulation of buildings.  
Building Performance Simulation Tools (BPSTs).  
Estimated time: 10min. 60 questions.  
Thank you.

**ARIE Research Group. Universidad CEU San Pablo. Madrid (Spain)**

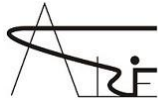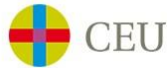

## 1. Profession

*Mark one only answer.*

- ☐ Architect
- ☐ Architect and Architecture professor
- ☐ Student
- ☐ Other

**1.a) If “other” is selected, say which one:**

---

**2.If you are an architect, how many years of professional experience do you have?**

*Mark one only answer.*

- ☐ Less than 5 years
- ☐ 5-10 years
- ☐ 10-20 years
- ☐ More than 20 years

## 3. Projects in which you are involved

*More than one answer may be selected.*

- ☐ Residential
- ☐ Hotel
- ☐ Education
- ☐ Health
- ☐ Office
- ☐ Renovation
- ☐ Commercial
- ☐ Industrial
- ☐ Other

**4. Among the following categories, identify the one which best fits your architecture practice**

*More than one answer may be selected.*

- ☐ Traditional with variety in projects
- ☐ Traditional with building renovation or refurbishment
- ☐ Design and construction
- ☐ Construction management
- ☐ Other

**5. N° of employers in your company / office / workplace**

*Mark one only answer.*

- ☐ Less than 3
- ☐ 3-10
- ☐ 11-50
- ☐ More than 50
- ☐ Nobody

**5.a) Country where you work**

---

**6. From what year do you think there is a general interest in energy simulation?**

*Mark one only answer.*

- ☐ Prior to 1960
- ☐ 1960-70
- ☐ 1970-80
- ☐ From 1990
- ☐ No answer

**7. As per your viewpoint BPSTs' evolution from 1997 to 2010 has been...**

*Mark one only answer.*

- ☐ Doubled
- ☐ Unchanged
- ☐ Quadrupled
- ☐ No answer

**8. How would you define energy simulation?**

*More than one answer may be selected.*

- ☐ Calculation tool which serves to test, prevent, and optimize buildings
- ☐ Tool used to design a sustainable building (new or refurbished)
- ☐ Tool used to achieve energy savings and the efficient functioning of buildings
- ☐ No answer

**8.a) Please, write your own definition**

---

---

---

---

---

**9. What do you think is the objective of energy simulation?**

*More than one answer may be selected.*

- ☐ It enables us to analyze both the quality and the environmental demand of buildings
- ☐ It enables us to develop a proper calculation in order to foresee the future building performance
- ☐ It enables us to detect efficient methods to reduce the building energy consumption
- ☐ It helps us to decide the best design strategy at the first stage of the architectural project
- ☐ No answer

**9.a) Please, write another possible objective**

---

---

---

---

---

**10. Which parameters do you think are considered in a BPST?**

*More than one answer may be selected.*

- ☐ Thermal zones
- ☐ Building type
- ☐ Openings (glasses and skylights)
- ☐ Outdoor shadow
- ☐ Indoor heat gain (occupation, equipment, lighting...)
- ☐ HVAC systems (heat, ventilation and air-conditioning)
- ☐ Climate
- ☐ Environment
- ☐ None of the above
- ☐ No answer

**11. In order to simulate a building, which of the following statements do you think is/are correct?**

*More than one answer may be selected.*

- ☐ The geometry definition must be as detailed as possible
- ☐ Form abstraction and maximum simplification of the geometry
- ☐ I do not think that buildings could be correctly simulated
- ☐ No answer

**12. Do you think that building geometry should be simplified for in order to carry out the simulations?**

*Mark one only answer.*

- ☐ Yes
- ☐ No
- ☐ Possibly

**13. Which type of user do you think works with BPSTs?**

*More than one answer may be selected.*

- ☐ Architects
- ☐ Engineers
- ☐ Energy consultants
- ☐ Researchers
- ☐ No answer

**4. What is the architects' level of knowledge of BPSTs?**

*Mark one only answer.*

- ☐ Good
- ☐ Sufficient
- ☐ Insufficient
- ☐ No answer

**15. Which of the following BPSTs have you used?**

*More than one answer may be selected.*

- ☐ Ecotect
- ☐ SketchUp
- ☐ Design Builder
- ☐ Open Studio plug-in
- ☐ Energy Plus
- ☐ None

**15. a) If you have used other BPSTs, please name them**

---

---

---

---

---

**16.a) In which stage of the design process do you use the following software?***More than one answer may be selected.*

|                                                                 | Conceptual stage         | Initial design           | Detailed design          | Construction stage       | No use                   |
|-----------------------------------------------------------------|--------------------------|--------------------------|--------------------------|--------------------------|--------------------------|
| CAD tools<br>(Rhino, Revit, AutoCAD, 3DS Max...)                | <input type="checkbox"/> |
| Visualization tools (V-Ray, Atlantis...)                        | <input type="checkbox"/> |
| Simulation tools<br>(Ecotect, DesignBuilder, Trnsys, Energy...) | <input type="checkbox"/> |

**16.b) Which is your skill in the use of the following software?***More than one answer may be selected.*

|                                                                 | Far advanced             | Advanced                 | Normal                   | Low                      | Very low                 |
|-----------------------------------------------------------------|--------------------------|--------------------------|--------------------------|--------------------------|--------------------------|
| CAD tools (Rhino, Revit, AutoCAD, 3DS Max...)                   | <input type="checkbox"/> |
| Visualization tools (V-Ray, Atlantis...)                        | <input type="checkbox"/> |
| Simulation tools<br>(Ecotect, DesignBuilder, Trnsys, Energy...) | <input type="checkbox"/> |

**17. In your university, specifically in Architecture studies, is there a use of BPSTs ?***Mark one only answer.*

- ☐ Yes
- ☐ No
- ☐ Possibly

**18. What do you think is the energy-assessment teaching level in the university?***Mark one only answer.*

|        |                       |                       |                       |                       |                       |      |
|--------|-----------------------|-----------------------|-----------------------|-----------------------|-----------------------|------|
|        | 1                     | 2                     | 3                     | 4                     | 5                     |      |
| Little | <input type="radio"/> | Much |

**19. To what extent do you think your university promotes the interest in energy simulation?***Mark one only answer.*

|        |                       |                       |                       |                       |                       |      |
|--------|-----------------------|-----------------------|-----------------------|-----------------------|-----------------------|------|
|        | 1                     | 2                     | 3                     | 4                     | 5                     |      |
| Little | <input type="radio"/> | Much |

**20. What do you think is the level of significance of BPSTs training in the university?***Mark one only answer.*

|        |                       |                       |                       |                       |                       |      |
|--------|-----------------------|-----------------------|-----------------------|-----------------------|-----------------------|------|
|        | 1                     | 2                     | 3                     | 4                     | 5                     |      |
| Little | <input type="radio"/> | Much |



**21. How do you think the use of BPSTs can be promoted in your university?***More than one answer may be selected.*

- ☐ Lectures and workshops with experts or stakeholders in the building simulation field
- ☐ Use of BPSTs in undergraduate courses or master thesis projects
- ☐ Through courses in Official School of Architects
- ☐ Courses in master's degree or doctoral degree

**21.a) Please, write a suggestion to enhance the general interest in BPSTs**


---



---



---



---



---

**22. Do you think that BPSTs learning should be carried out by trial and error process?***Mark one only answer.*

- ☐ Yes
- ☐ No
- ☐ Possibly

**23. Do you think that the validation of outcomes (through comparison with real results) is necessary?***Mark one only answer.*

- ☐ Yes
- ☐ No
- ☐ Possibly

**24. Do you use BPSTs tools at work?***Mark one only answer.*

- ☐ Yes
- ☐ No
- ☐ Occasionally

**25. How many people do you know who use BPSTs tools?***Mark one only answer.*

- ☐ Less than 5
- ☐ 5-20
- ☐ More than 20
- ☐ None

**26. If you have not used BPSTs, indicate the reasons***More than one answer may be selected.*

- ☐ I do not need them
- ☐ I do not have enough motivation
- ☐ Architects are not responsible of these issues
- ☐ Unknown tools
- ☐ Insufficient knowledge in the field
- ☐ High economic cost
- ☐ Hard to learn

**26. a) Other reasons**


---



---



---



---



---

**27. According to your opinion, in which type of projects do you think BPSTs are necessary?***More than one answer may be selected.*

- ☐ Simple projects
- ☐ Complex projects
- ☐ Always
- ☐ No answer

**28. How would you manage the decision making for the integration of BPSTs in the case of small projects?***More than one answer may be selected.*

- ☐ I would do it myself
- ☐ Consulting another architect
- ☐ Involving an external consultant (specialist)
- ☐ Involving someone (other profession)
- ☐ No answer

**28.a) Please, indicate a proposal:**


---



---



---



---



---

**29. Which do you think is the best stage to use energy simulation?***More than one answer may be selected.*

- ☐ Conceptual stage. Initial design
- ☐ Design optimization
- ☐ Construction
- ☐ Regulation
- ☐ Last stages of the design to verify and validate results

**30. Do you think that BPSTs speed up the design stage?***Mark one only answer.*

- ☐ Yes
- ☐ No
- ☐ Possibly

**31. Do you think that simulation software can help you create the geometry of your architectural work?***Mark one only answer.*

- ☐ Yes
- ☐ No
- ☐ Possibly

**32. In which of the following fields do you think BPSTs can be useful?***More than one answer may be selected.*

- ☐ Heating and cooling
- ☐ Air quality and ventilation
- ☐ Thermal comfort
- ☐ Acoustics
- ☐ Daylight and artificial lighting
- ☐ Fire safety
- ☐ All of them
- ☐ No answer

**33. Do you think building simulation is essential before its construction?***Mark one only answer.*

- ☐ Yes
- ☐ No
- ☐ Possibly

**34. What do you think should be the economic cost of BPSTs?***Mark one only answer.*

- ☐ Free
- ☐ Higher than the one of Autocad
- ☐ Lower than the one of Autocad
- ☐ Very high
- ☐ High but with discounts for students
- ☐ No answer

**35. Among the following categories, identify which one best corresponds to the architectural design process followed by you:***More than one answer may be selected.*

- ☐ Intuitive decisions taken using generalities
- ☐ Architect's experience
- ☐ Collaboration with other professionals within multidisciplinary groups
- ☐ Interaction between future users of the building
- ☐ Design through computer simulations
- ☐ Other

**36. Building design depends on architect's ability and experience***Mark one only answer.*

- ☐ Fully agreed
- ☐ Agreed
- ☐ Disagreed
- ☐ No answer

**37. Building design can be substituted by quantitative simulation software:***Mark one only answer.*

- ☐ Fully agreed
- ☐ Agreed
- ☐ Disagreed
- ☐ No answer

**38. Which of the following tools do you use in order to provide an optimum building design?***More than one answer may be selected.*

- ☐ Own experience
- ☐ Design guidelines, generalities
- ☐ Energy certifications
- ☐ Lider-Calener
- ☐ External consultancy (professionals)
- ☐ Computer simulations
- ☐ Interactions with the owner
- ☐ Collaboration with other architects
- ☐ Other

**39. BPSTs enable architects to reconsider several aspects previously ignored during the design process:***Mark one only answer.*

- ☐ Fully agreed
- ☐ Agreed
- ☐ Disagreed
- ☐ No answer

**40. The energy aspects related to efficiency are a barrier for architects while creating adequate constructions in order to develop a functional building***Mark one only answer.*

- ☐ Fully agreed
- ☐ Agreed
- ☐ Disagreed
- ☐ No answer

**41. An optimum-shape design is effective to avoid the use of blinds, awnings, doubled-glasses and modifications altering the shape design of the building***Mark one only answer.*

- ☐ Fully agreed
- ☐ Agreed
- ☐ Disagreed
- ☐ No answer

**42. Do you think that BPSTs data export is NOT adapted to the architectural design necessities?***Mark one only answer.*

|        |                       |                       |                       |                       |                       |      |
|--------|-----------------------|-----------------------|-----------------------|-----------------------|-----------------------|------|
|        | 1                     | 2                     | 3                     | 4                     | 5                     |      |
| Little | <input type="radio"/> | Much |

**43. Are improved tools necessary in order to integrate the energy assessment within the design?***Mark one only answer.*

- ☐ Yes, we do need improved tools for the architectural integration
- ☐ Yes, we do need improved tools for the initial dimensioning of energy systems
- ☐ Yes, we do need improved tools in order to provide energy data
- ☐ Yes, we do need tools providing data for the construction process
- ☐ No, I consider that existent tools are successful
- ☐ None of the above

**44. BPSTs raise confidence for taking architectural decisions***Mark one only answer.*

- ☐ Fully agreed
- ☐ Agreed
- ☐ Disagreed
- ☐ No answer

**45. BPSTs lack of knowledge is what makes stakeholder not to trust in them***Mark one only answer.*

- ☐ Fully agreed
- ☐ Agreed
- ☐ Disagreed
- ☐ No answer

**46. Do you think that the data obtained through simulation software are correct?***Mark one only answer.*

- ☐ Yes
- ☐ No
- ☐ Possibly
- ☐ No answer

**47. In order to obtain confidence, It is important to collaborate with experts in simulation software***Mark one only answer.*

- ☐ Fully agreed
- ☐ Agreed
- ☐ Disagreed
- ☐ No answer

**48. Professionals using BPSTs have an absolute control on its parameters***Mark one only answer.*

- ☐ Fully agreed
- ☐ Agreed
- ☐ Disagreed
- ☐ No answer

**49. Are you interested in the use of BPSTs in the future?***Mark one only answer.*

- ☐ Yes
- ☐ No
- ☐ Possibly

**50. It is possible to incorporate every decision made by an energy consultant in the design without damaging it**

*Mark one only answer.*

- ☐ Fully agreed
- ☐ Agreed
- ☐ Disagreed
- ☐ No answer

**51. Incorporating numerical data to the design must be learnt**

*Mark one only answer.*

- ☐ Fully agreed
- ☐ Agreed
- ☐ Disagreed
- ☐ No answer

**52. Do you think that BPSTs are intended for professionals who are not architects?**

*Mark one only answer.*

- ☐ Yes
- ☐ No
- ☐ Possibly

**53. Do you think that BPSTs are intended for nearly zero energy buildings design?**

*Mark one only answer.*

- ☐ Yes
- ☐ No
- ☐ Possibly

**54. Do you think that BPSTs limit the architect's creativity during the design stage?**

*Mark one only answer.*

- ☐ Yes
- ☐ No
- ☐ Possibly

**55. Energy simulation interests you**

*Mark one only answer.*

|        |                       |                       |                       |                       |                       |      |
|--------|-----------------------|-----------------------|-----------------------|-----------------------|-----------------------|------|
|        | 1                     | 2                     | 3                     | 4                     | 5                     |      |
| Little | <input type="radio"/> | Much |

**56. How BPSTs can be implemented in architecture offices?***More than one answer may be selected.*

- ☐ Training students
- ☐ Hiring an expert
- ☐ Being mandatory to meet the regulation
- ☐ Being essential in architecture offices

**57. Do you think that guides are necessary in order to show equivalences between the results obtained from BPSTs and passive strategies designed by architects?***Mark one only answer.*

|        | 1                     | 2                     | 3                     | 4                     | 5                     |      |
|--------|-----------------------|-----------------------|-----------------------|-----------------------|-----------------------|------|
| Little | <input type="radio"/> | Much |

**58. Do you think that the identification of both architects' specific necessities and software advantages and disadvantages are essential in order to facilitate the use of BPSTs ?** *Mark one only answer.*

- ☐ Yes
- ☐ No
- ☐ Possibly

**59. Please, give your opinion or provide suggestions about the relationship between architects and simulation software.**


---



---



---



---



---

**Please, press NEXT if you have used BPSTs in order to continue with the survey. If you have not used BPSTs, please scroll down and press SEND**

---

Thank you very much

**Energy simulation software**

Just for respondents who have used these type of software 15 questions. Estimated time: 5 minutes.

**60. Have you taken specific training?***Mark one only answer.*

- ☐ Yes
- ☐ No
- ☐ Self-taught



**60.a) Where?**


---



---



---



---



---

**60. b) If you have been self-taught, describe the quality of the software manuals used?***Mark one only answer.*

- ☐ Very good
- ☐ Good
- ☐ Normal
- ☐ Bad
- ☐ Very bad

**61. How often do you use simulation softwares?***Mark one only answer.*

- ☐ Often
- ☐ Occasionally
- ☐ In Architecture competitions
- ☐ Never
- ☐ Other

**62. How many years have you been using BPSTs?***Mark one only answer.*

- ☐ Less than 1 year
- ☐ 1-2 years
- ☐ 2-3 years
- ☐ 3-5 years
- ☐ 5-20 years

**63. Describe your level of satisfaction with the use of BPSTs***Mark one only answer.*

|        |                       |                       |                       |                       |                       |      |
|--------|-----------------------|-----------------------|-----------------------|-----------------------|-----------------------|------|
|        | 1                     | 2                     | 3                     | 4                     | 5                     |      |
| Little | <input type="radio"/> | Much |

**64. Do you think that the use of BPSTs is important in Architecture?***Mark one only answer.*

- ☐ Important
- ☐ Normal
- ☐ Not important

**65. Do you think that the use BPSTs is important in your field as an architect?***Mark one only answer.*

- ☐ Important
- ☐ Normal
- ☐ Not important

**66. How often do you use BPSTs to develop your projects?***Mark one only answer.*

- ☐ Always
- ☐ Often
- ☐ Some times
- ☐ Ocasionally
- ☐ Never

**67. Do you know any simulation tool which can be adequate for architects?***Mark one only answer.*

- ☐ Yes
- ☐ No

**67.a) Which one?**

---

**68. To what extent the following parameters influence the selection of a BPST software?  
1(Little) 5(Much)***Mark one only answer.*

|                                                       | 1                     | 2                     | 3                     | 4                     | 5                     |
|-------------------------------------------------------|-----------------------|-----------------------|-----------------------|-----------------------|-----------------------|
| Simple interface design                               | <input type="radio"/> |
| Data export with other software(Autocad, Sketchup...) | <input type="radio"/> |
| Cost                                                  | <input type="radio"/> |
| Simulation time                                       | <input type="radio"/> |
| 3D modelling included in the same software            | <input type="radio"/> |
| Easy data entry                                       | <input type="radio"/> |
| Position in the market                                | <input type="radio"/> |
| Adaptation to the national regulation                 | <input type="radio"/> |
| Easy interpretation of the results                    | <input type="radio"/> |
| Auxiliary use of additional software                  | <input type="radio"/> |
| Easy training                                         | <input type="radio"/> |

**69. Which of the next actions do you think is more important?***More than one answer may be selected.*

- ☐ Explanation of the data input in the software
- ☐ Easy validation of the energy simulation (compared to real cases)
- ☐ Simplification of the options of the software to provide an easier interpretation of the results
- ☐ Detailed explanation of energy simulation software and its advantages for the architectonic design
- ☐ None

**70. To what extent the following criteria are important considering the use and interface?  
1(Little) 5(Much)***Mark one only answer.*

|                                         | 1                     | 2                     | 3                     | 4                     | 5                     |
|-----------------------------------------|-----------------------|-----------------------|-----------------------|-----------------------|-----------------------|
| Easy output interpretation              | <input type="radio"/> |
| Flexible use                            | <input type="radio"/> |
| Graphical representation of the results | <input type="radio"/> |
| Adaptation to the national regulation   | <input type="radio"/> |
| Easy training                           | <input type="radio"/> |

**71. To what extent do you think the following characteristics suppose a barrier for the BPSTs use? 1(Little) 5(Much)***Mark one only answer.*

|                                                             | 1                     | 2                     | 3                     | 4                     | 5                     |
|-------------------------------------------------------------|-----------------------|-----------------------|-----------------------|-----------------------|-----------------------|
| Software evolution                                          | <input type="radio"/> |
| Complexity of use                                           | <input type="radio"/> |
| Learning curve                                              | <input type="radio"/> |
| Software tools not integrated in CAD tools                  | <input type="radio"/> |
| High economic cost                                          | <input type="radio"/> |
| Poor interface                                              | <input type="radio"/> |
| Interpretation of outcomes                                  | <input type="radio"/> |
| Simple tools which do not provide the necessary information | <input type="radio"/> |

**72. To what extent do you think the following characteristics about the use of BPSTs are important? 1(Little) 5(Much)**

*Mark one only answer.*

|                                                                                       | 1                     | 2                     | 3                     | 4                     | 5                     |
|---------------------------------------------------------------------------------------|-----------------------|-----------------------|-----------------------|-----------------------|-----------------------|
| Data input and output, navigation and control                                         | <input type="radio"/> |
| Learning curve                                                                        | <input type="radio"/> |
| Documentation, online help                                                            | <input type="radio"/> |
| Software tools not integrated in CAD tools                                            | <input type="radio"/> |
| Tables for consulting                                                                 | <input type="radio"/> |
| Use default values and data input templates                                           | <input type="radio"/> |
| Database where construction materials are easily found Base                           | <input type="radio"/> |
| Graphic representation of the design parameters (easy to understand by architects) 3D | <input type="radio"/> |
| Visualization and design strategies                                                   | <input type="radio"/> |
| Templates for the user relating to HVAC                                               | <input type="radio"/> |
| Error checking in order to ensure that the models used are correct                    | <input type="radio"/> |
| GLOBAL ASSESSMENT CRITERION                                                           | <input type="radio"/> |

**73. To what extent do you think the following characteristics about knowledge are important? 1(Little) 5(Much)**

*Mark one only answer.*

|                                                                   | 1                     | 2                     | 3                     | 4                     | 5                     |
|-------------------------------------------------------------------|-----------------------|-----------------------|-----------------------|-----------------------|-----------------------|
| Qualitative and quantitative knowledge about the design decisions | <input type="radio"/> |
| Templated creation                                                | <input type="radio"/> |
| Meeting the codes and rating systems                              | <input type="radio"/> |
| Find objective responses to design question.                      | <input type="radio"/> |
| Life-cycle assessments                                            | <input type="radio"/> |
| Economic aspects                                                  | <input type="radio"/> |
| Definition of the most important parameters in the design stage   | <input type="radio"/> |
| Approach based on comparative design                              | <input type="radio"/> |
| Generation of design alternatives                                 | <input type="radio"/> |
| Materials selection during the design stage                       | <input type="radio"/> |
| Decision making process                                           | <input type="radio"/> |
| Low cost buildings                                                | <input type="radio"/> |
| Orientation about passive design                                  | <input type="radio"/> |
| Big components library (façades, roofs, etc...)                   | <input type="radio"/> |
| GLOBAL ASSESSMENT CRITERION                                       | <input type="radio"/> |

**74. To what extent do you think the following characteristics about ABILITIES are important? 1(Little) 5(Much)**

*Mark one only answer.*

|                                                      | 1                     | 2                     | 3                     | 4                     | 5                     |
|------------------------------------------------------|-----------------------|-----------------------|-----------------------|-----------------------|-----------------------|
| Validity, quality and resolution                     | <input type="radio"/> |
| Accuracy                                             | <input type="radio"/> |
| Ability to simulate elements with sufficient detail  | <input type="radio"/> |
| Optimization of the building envelope                | <input type="radio"/> |
| Consideration of natural ventilation                 | <input type="radio"/> |
| Information of the cost of energy reduction measures | <input type="radio"/> |
| GLOBAL ASSESSMENT CRITERION                          | <input type="radio"/> |

**75. To what extent do you think the following characteristics about INTEROPERABILITY are important? 1(Little) 5(Much)**

*Mark one only answer.*

|                                                                                                           | 1                     | 2                     | 3                     | 4                     | 5                     |
|-----------------------------------------------------------------------------------------------------------|-----------------------|-----------------------|-----------------------|-----------------------|-----------------------|
| It transfers information from one software to another without losing information and in a comfortable way | <input type="radio"/> |
| It enables to manage and communicate construction data between different collaborators                    | <input type="radio"/> |
| It allows modeling of organic volumen and non-cubic zones                                                 | <input type="radio"/> |
| It allows the input of multiple modeling programs                                                         | <input type="radio"/> |
| GLOBAL ASSESSMENT CRITERION                                                                               | <input type="radio"/> |

**76. To what extent do you think the following characteristics about DESIGN are important? 1(Little) 5(Much)**

*Mark one only answer.*

|                                                               | 1                     | 2                     | 3                     | 4                     | 5                     |
|---------------------------------------------------------------|-----------------------|-----------------------|-----------------------|-----------------------|-----------------------|
| Alternation of the simulation process with the design process | <input type="radio"/> |
| Multidisciplinary interfaces                                  | <input type="radio"/> |
| GLOBAL ASSESSMENT CRITERION                                   | <input type="radio"/> |

**77. Please, write your opinion or suggestion**

---



---



---



---



---

**78. Please, write your general opinion about this survey**

---

**THANK YOU VERY MUCH. Please, do not forget to press SEND**

---
